# Supplementary material for: Type 3 innate lymphoid cells producing IL-17 and IL-22 are expanded in the gut, in the peripheral blood, synovial fluid and bone marrow of patients with ankylosing spondylitis
Source: HighWire-hosted journal article supplement (doi:10.1136/annrheumdis-2014-206323), 2015-04-23
Supplement: annrheumdis-2014-206323supp_figures.pdf [file annrheumdis-2014-206323supp_figures.pdf]

Supplementary Figures:

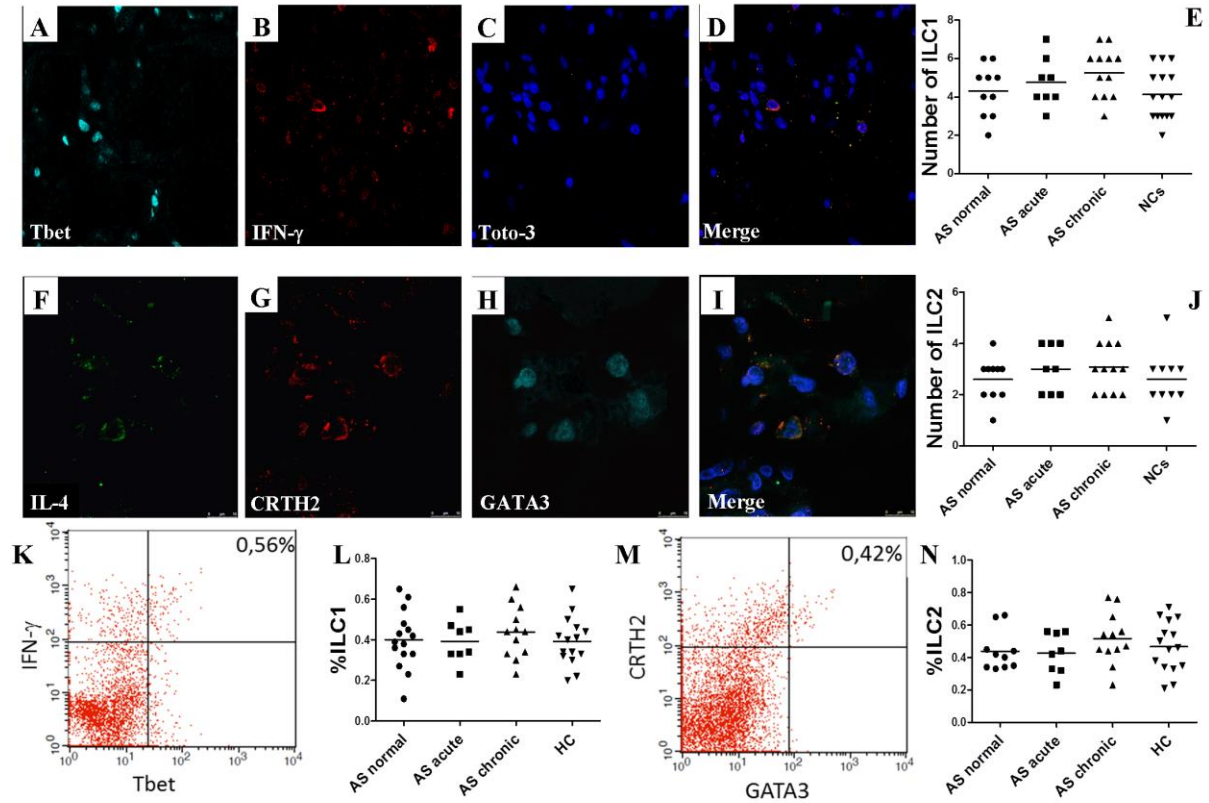

**Supplemental Figure 1. Innate lymphoid 1 and 2 cells in the gut of AS patients.** **A-D**: Representative images of confocal analysis of Tbet and IFN- $\gamma$  co-localization in gut tissues of AS patients. **A**: single staining for Tbet; **B**: single staining for IFN- $\gamma$ ; **C**: nuclei counterstained with toto-3 (blue). **D**: merged double staining of Tbet and IFN- $\gamma$  (Arrow indicates positive cells). **E**: quantification of ILC1 in the gut of AS patients and controls. **F-I**: Representative images of confocal analysis of IL-4, CRTH2 and GATA3 co-localization in gut tissues of AS patients. **F**: single staining for IL-4; **G**: single staining for GATA-3; **H**: single staining for CRTH2. Nuclei were counterstained with toto-3 (blue). **I**: merged triple staining of IL-4, GATA-3 and CRTH2. **J**: quantification of ILC2 in the gut of AS patients and controls. **K-L**: ILC1 characterized by flow cytometry: cells were gated on  $Lyn^+CD56^+$  IFN- $\gamma^+$  Tbet $^+$  regions. **K**: representative dot plot showing ILC1 in the gut of a patient with AS and **L**, percentage of ILC1 in the LPMC obtained from gut of 5 AS patients and 5 healthy controls. **M-N**: ILC2 were characterized by flow cytometry. Cells were gated on  $Lyn^+CRTH2^+$  GATA3 $^+$  regions. **M**: representative dot plot showing ILC2 in the gut of a patient with AS and **N**, percentage of ILC2 in the LPMC obtained from gut of 5 AS patients and 5 healthy controls. **A-D**, **F-I**: original magnification x 400. **E**, **J**, **L**, **N**: data are expressed as individual data points (Mean).

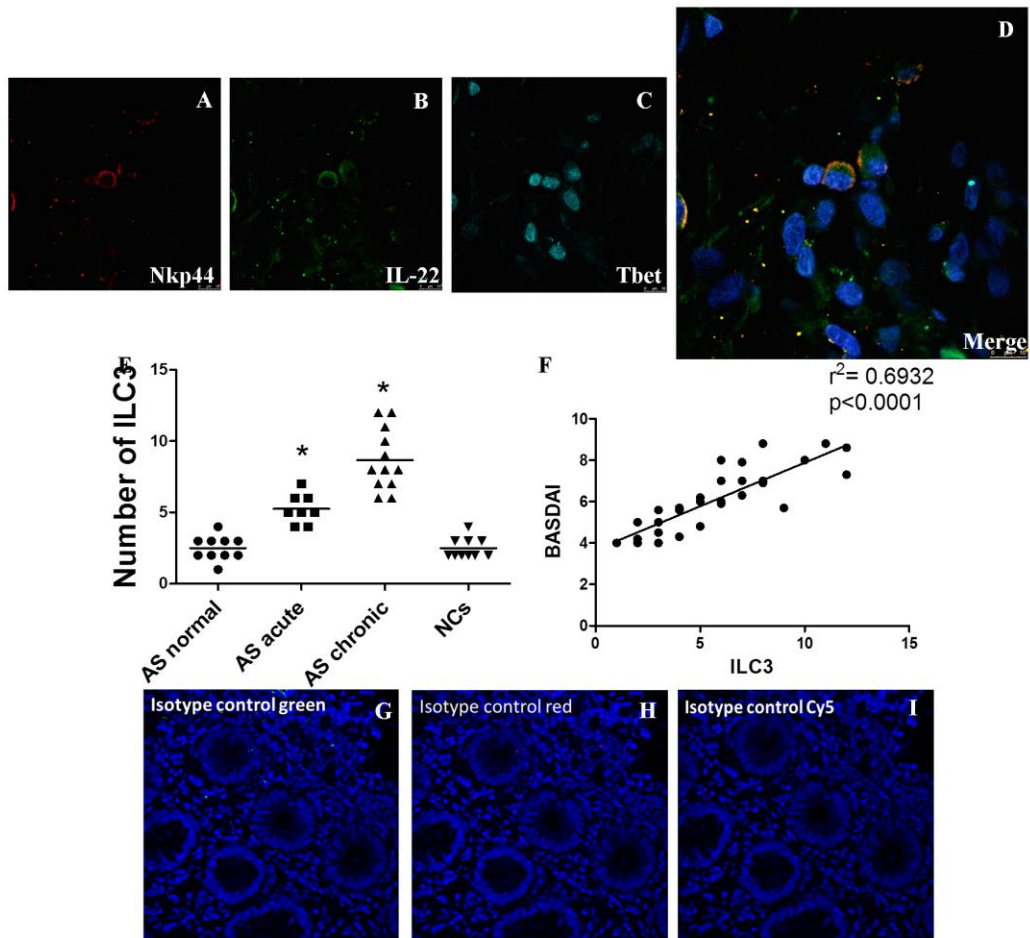

**Supplemental Figure 2.** **A-D:** Representative images of confocal analysis of NKp44, Tbet and IL-22 co-localization in gut tissues of AS patients. **E:** quantification of ILC3 in the gut of AS patients and controls. **F:** correlation between the number of ILC3 and disease activity as assessed by Bath Ankylosing Spondylitis Activity Index (BASDAI). **G-I:** isotype controls for confocal staining. **A-D:** original magnification x 630. **G-I:** original magnification x400. Data are expressed as individual data points (Mean). \* $p < 0.05$

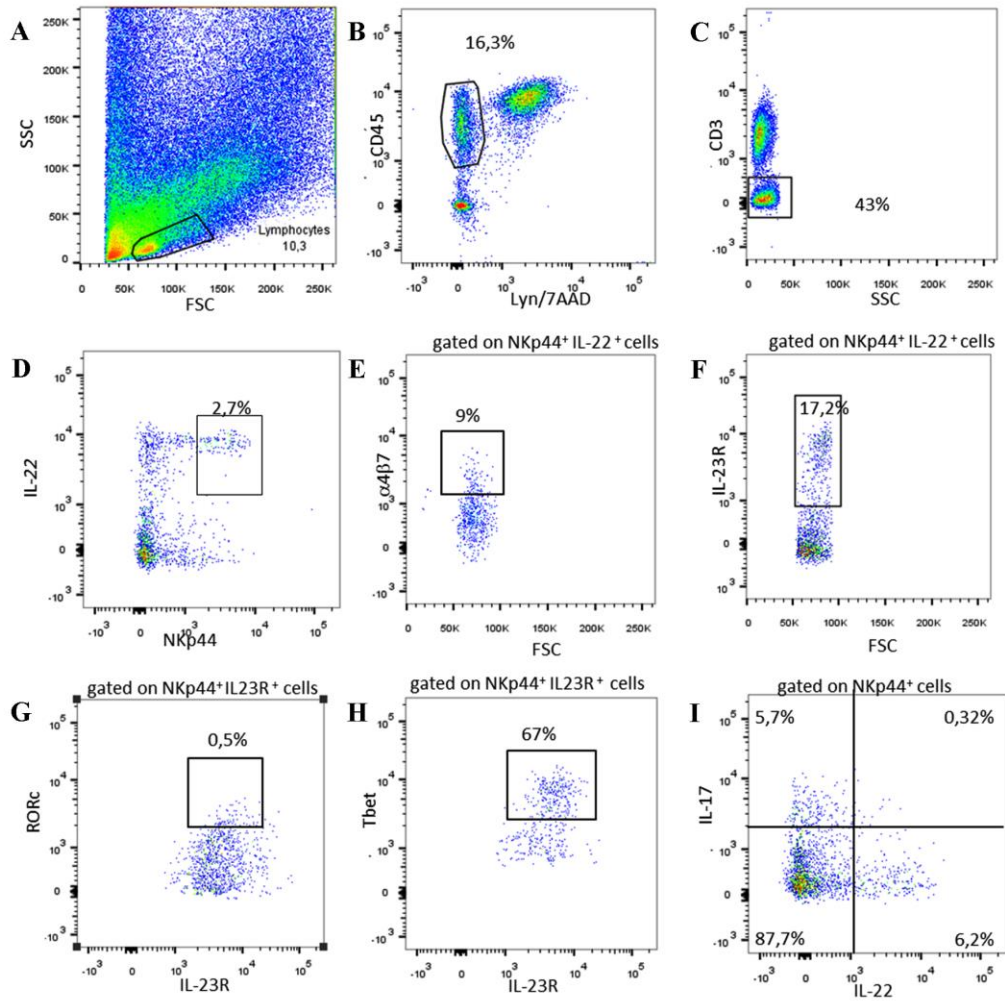

**Supplemental Figure 3. Innate lymphoid cells type 3 in the gut of normal controls. A-I:** representative dot plots showing the gating strategy for ILC3 in the gut of controls.

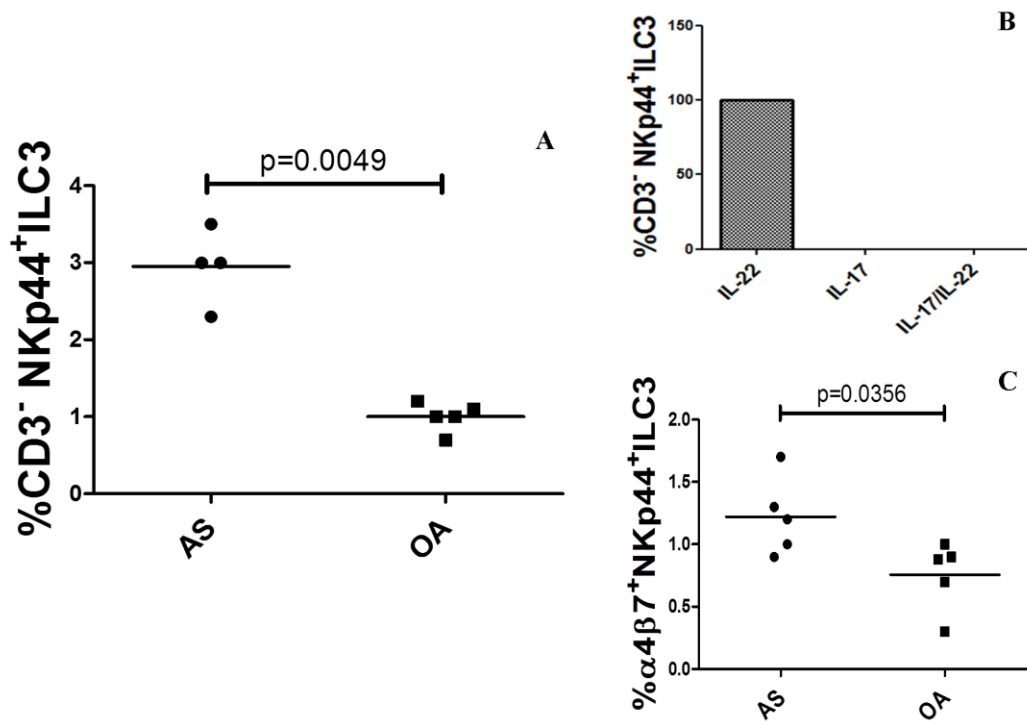

**Supplemental Figure 4. Innate lymphoid cells type 3 in the synovial fluid (SF) of AS patients. A:** percentage of CD3<sup>-</sup>ILC3 in the synovial fluids of Ankylosing Spondylitis (AS) and osteoarthritis (OA) patients. **B:** cytokine production by SF CD3<sup>-</sup>ILC3 in AS patients. **C:** α4β7 expression on CD3<sup>-</sup>ILC3 isolated from the SF of AS and OA patients. Data are expressed as individual data points (Mean)

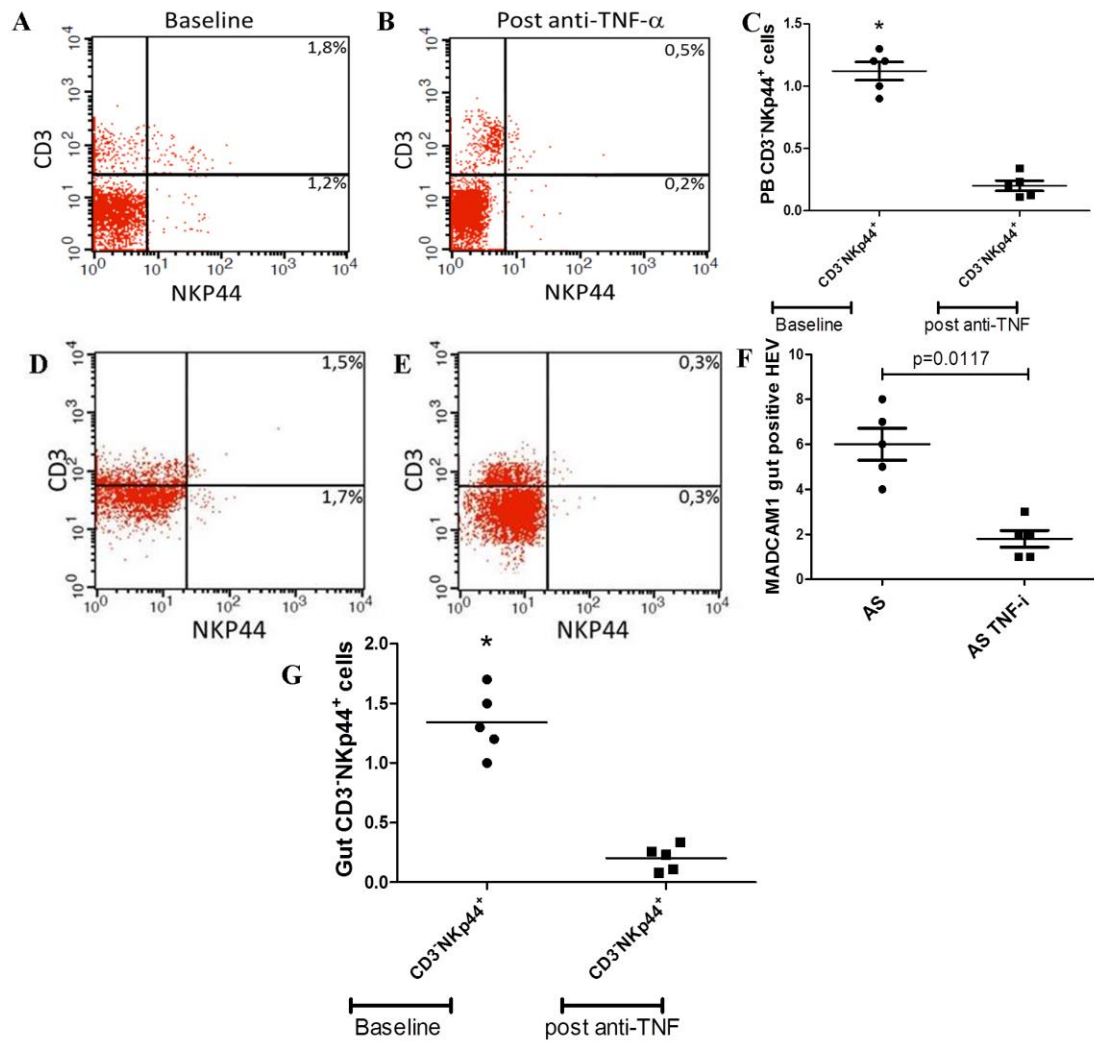

**Supplemental Figure 5. Effect of TNF-inhibitors (TNFi) on circulating and gut ILC-3.** A-B and D-E: representative dot plots showing the percentage of circulating (A-B) and intestinal (D-E) ILC3 before TNF-i in 5 AS patients. C, F: percentage of circulating (C) and intestinal (F) ILC3 before and after TNF-i. G numbers of gut MADCAM1<sup>+</sup> HEV in AS patients before and after TNFi. Data are shown as individual data points (Mean). p<0.05
