# Supplementary material for: Type 3 innate lymphoid cells producing IL-17 and IL-22 are expanded in the gut, in the peripheral blood, synovial fluid and bone marrow of patients with ankylosing spondylitis
Source: HighWire-hosted journal article supplement (doi:10.1136/annrheumdis-2014-206323), 2015-04-23
Supplement: annrheumdis-2014-206323supp_table.pdf [file annrheumdis-2014-206323supp_table.pdf]

Supplemental Table 1. Baseline characteristics of patients and controls

|                                       | AS no inflammation<br>(N=10) | AS Acute<br>(N=8) | AS Chronic<br>(N=12) | nrAxSpA<br>(N=5) | Controls<br>(N=15) |
|---------------------------------------|------------------------------|-------------------|----------------------|------------------|--------------------|
| Age, mean (range) years               | 38 (20-55)                   | 32 (24-48)        | 36 (26-50)           | 28 (18-34)       | 56 (33-68)         |
| Sex, no. (%) male                     | 7 (70)                       | 6 (75)            | 10 (83)              | 2 (40)           | 8 (53)             |
| HLA-B27 (%)                           | 100                          | 100               | 100                  | 100              | -                  |
| Disease duration, mean (range) months | 28 (12-36)                   | 21 (14-29)        | 31 (12-44)           | 12 (4-14)        | -                  |
| CRP (mg/l), mean (range)              | 1.5 (0.5-2.2)                | 1.8 (0.7-3)       | 2.2 (1-4.4)          | 2 (0.8-2.9)      | -                  |
| Axial involvement, no. (%)            | 10 (100)                     | 8 (100)           | 12 (100)             | 5 (100)          | -                  |
| Peripheral arthritis, no. (%)         | 1 (10)                       | 2 (25)            | 2 (17)               | 0                | -                  |
| Enthesitis/dactylitis, no. (%)        | -                            | 1 (12)            | 2 (17)               | -                | -                  |
| Uveitis, no. (%)                      | -                            | -                 | 3 (25)               | -                | -                  |
| BASDAI score, mean (range)†           | 5.6 (4.5-8)                  | 6.2 (4.6-8.8)     | 6.65 (4.4-9)         | 5.8 (5.5-9)      | -                  |
| NSAIDs (%)                            | 4 (40)                       | 3 (37)            | 4 (33)               | 2(25)            | -                  |

Supplemental Table 2: List of antibodies and primers

| <b>Antibody</b>              | <b>Immunohistochemistry</b>       | <b>Flow cytometry</b>            |
|------------------------------|-----------------------------------|----------------------------------|
| Anti-human CD3               | Dako, Glostrup, Denmark           | Becton, Dickinson USA            |
| Anti-human CD4               | Dako, Glostrup, Denmark           | Becton, Dickinson USA            |
| Anti-human CD8               | Dako, Glostrup, Denmark           | Becton, Dickinson USA            |
| Anti-human T-bet             | Abcam, Cambridge, UK              | Abcam, Cambridge, UK             |
| Anti-human IFN- $\gamma$     | Abcam, Cambridge, UK              | Becton, Dickinson USA            |
| Anti-human GATA3             | Abcam, Cambridge, UK              | Becton, Dickinson USA            |
| Anti-human CRTH2             | LifeSpan BioScience, Inc. Seattle | Becton, Dickinson USA            |
| Anti-human Nkp44             | LifeSpan BioScience, Inc. Seattle | Biologend, San Diego, California |
| Anti-human RORc              | Novus Biologicals, Colorado       | Becton, Dickinson USA            |
| Anti-human CD56              | Dako, Glostrup, Denmark           | Becton, Dickinson USA            |
| Anti-human $\alpha 4\beta 7$ | Novus Biologicals, Colorado       | Biologend, San Diego, California |
| Anti-human IL-22             | Novus Biologicals, Colorado       | Becton, Dickinson USA            |
| Anti-human IL-17             | Novus Biologicals, Colorado       | Becton, Dickinson USA            |
| Anti-human IL-7              | Novus Biologicals, Colorado       | /                                |
| Anti-human IL-15             | Novus Biologicals, Colorado       | /                                |
| Anti-human MADCAM1           | Novus Biologicals, Colorado       | /                                |
| Anti-human IL-23R            | /                                 | Becton, Dickinson USA            |
| Anti-human c-KIT             | Novus Biologicals, Colorado       | /                                |
| Anti-human Thy-1             | Novus Biologicals, Colorado       | /                                |
| Anti-human PNAd              | Novus Biologicals, Colorado       | /                                |
| Anti-human defensin 5        | Abcam, Cambridge, UK              | /                                |
| <b>Primers</b>               |                                   |                                  |
| IL-7                         | Hs00174202_m1                     |                                  |
| IL-15                        | Hs01003716_m1                     |                                  |
| 18s                          | Hs99999901_s1                     |                                  |
| GAPDH                        | Hs02758991_g1                     |                                  |
